# Supplementary material for: Disability related to chronic graft -versus-host disease after alternative donor hematopoietic cell transplantation
Source: PubMed Central journal article supplement — Haematologica. 2018 Nov 15;104(4):835–43. doi: 10.3324/haematol.2018.202754 (PMC6442956; doi:10.3324/haematol.2018.202754), 2019-04
Supplement: 2018_202754-Disclosures_and_Contributions.pdf [file 2018_202754-Disclosures_and_Contributions.pdf]

Haematologica  
HAEMATOL/2018/202754  
Version 3

Disability related to chronic graft-versus-host disease after alternative donor hematopoietic cell transplantation

Giancarlo Fatobene, Barry E. Storer, Rachel B. Salit, Stephanie J. Lee, Paul J. Martin, Guang-Shing Cheng, Paul A. Carpenter, Gansuud Balgansuren, Effie W. Petersdorf, Colleen Delaney, Brenda M. Sandmaier, Filippo Milano, and Mary E. Flowers

Disclosures: None

Contributions: G.F., B.E.S., P.J.M. and M.E.F. designed the study; G.F. and M.E.F. collected and analyzed data, prepared the manuscript draft and wrote the paper; B.E.S. performed the statistical analysis, analyzed the data and wrote the statistical methods. B.M.S. collected and manage the data on relapse in the mismatched unrelated adult donor group; G-S.C. reviewed the bronchiolitis obliterans data; S.J.L. helped with the inclusion criteria for mismatched unrelated donor group and with function end points in the study, G.B. and E.P. reviewed and assigned the data for the mismatched unrelated donor group; all authors contributed to the analysis and interpretation of the data and provided critical review of the manuscript.
